# Supplementary material for: An In Vitro Protocol for Propagating Castanea sativa Italian Cultivars
Source: MDPI journal article supplement (doi:10.3390/plants11233308), 2022-11-30
Supplement: s1 [file s1]

**Supplementary File S1:** media used for chestnut *in vitro* culture**Mineral solutions**

| <b>DKW (DUCHEFA, NL)</b>                             |                       |             |
|------------------------------------------------------|-----------------------|-------------|
|                                                      | <b>Micro Elements</b> | <b>mg/l</b> |
| CuSO <sub>4</sub> .5H <sub>2</sub> O                 |                       | 0.25        |
| FeNaEDTA                                             |                       | 44.63       |
| H <sub>3</sub> BO <sub>3</sub>                       |                       | 4.80        |
| MnSO <sub>4</sub> .H <sub>2</sub> O                  |                       | 33.80       |
| Na <sub>2</sub> MoO <sub>4</sub> .2H <sub>2</sub> O  |                       | 0.39        |
| ZnSO <sub>4</sub> .7H <sub>2</sub> O                 |                       | 17.00       |
|                                                      | <b>Macro Elements</b> | <b>mg/l</b> |
| CaCl <sub>2</sub>                                    |                       | 112.50      |
| Ca(NO <sub>3</sub> ) <sub>2</sub> .2H <sub>2</sub> O |                       | 1664.64     |
| KH <sub>2</sub> PO <sub>4</sub>                      |                       | 265.00      |
| K <sub>2</sub> SO <sub>4</sub>                       |                       | 1559.00     |
| MgSO <sub>4</sub>                                    |                       | 361.49      |
| NH <sub>4</sub> NO <sub>3</sub>                      |                       | 1416.00     |
|                                                      | <b>Vitamins</b>       | <b>mg/l</b> |
| Glycine                                              |                       | 2.00        |
| myo-Inositol                                         |                       | 100.00      |
| Nicotinic acid                                       |                       | 1.00        |
| Thiamine HCl                                         |                       | 2.00        |
| <b>MS3B (DUCHEFA, NL)</b>                            |                       |             |
|                                                      | <b>Micro Elements</b> | <b>mg/l</b> |
| CoCl <sub>2</sub> .6H <sub>2</sub> O                 |                       | 0.025       |
| CuSO <sub>4</sub> .5H <sub>2</sub> O                 |                       | 0.025       |
| FeNaEDTA                                             |                       | 36.70       |
| H <sub>3</sub> BO <sub>3</sub>                       |                       | 6.20        |
| KI                                                   |                       | 0.83        |
| MnSO <sub>4</sub> .H <sub>2</sub> O                  |                       | 16.90       |
| Na <sub>2</sub> MoO <sub>4</sub> .2H <sub>2</sub> O  |                       | 0.25        |
| ZnSO <sub>4</sub> .7H <sub>2</sub> O                 |                       | 8.60        |
|                                                      | <b>Macro Elements</b> | <b>mg/l</b> |
| CaCl <sub>2</sub>                                    |                       | 332.02      |
| KH <sub>2</sub> PO <sub>4</sub>                      |                       | 170.00      |
| KNO <sub>3</sub>                                     |                       | 950.00      |
| MgSO <sub>4</sub>                                    |                       | 180.54      |
| NH <sub>4</sub> NO <sub>3</sub>                      |                       | 825.00      |
|                                                      | <b>Vitamins</b>       | <b>mg/l</b> |
| Glycine                                              |                       | 2.00        |
| myo-Inositol                                         |                       | 100.00      |
| Nicotinic acid                                       |                       | 0.50        |

|                |      |
|----------------|------|
| Pyridoxine HCl | 0.50 |
| Thiamine HCl   | 0.10 |

---

**GD (DUCHEFA, NL)**


---

| <b>Micro Elements</b>                                | <b>mg/l</b> |
|------------------------------------------------------|-------------|
| CoCl <sub>2</sub> .6H <sub>2</sub> O                 | 0.025       |
| CuSO <sub>4</sub> .5H <sub>2</sub> O                 | 0.025       |
| FeNaEDTA                                             | 36.70       |
| H <sub>3</sub> BO <sub>3</sub>                       | 0.30        |
| KI                                                   | 0.80        |
| MnSO <sub>4</sub> .H <sub>2</sub> O                  | 1.00        |
| Na <sub>2</sub> MoO <sub>4</sub> .2H <sub>2</sub> O  | 0.025       |
| ZnSO <sub>4</sub> .7H <sub>2</sub> O                 | 0.30        |
| <b>Macro Elements</b>                                | <b>mg/l</b> |
| Ca(NO <sub>3</sub> ) <sub>2</sub> .2H <sub>2</sub> O | 208.81      |
| KCl                                                  | 65.00       |
| KH <sub>2</sub> PO <sub>4</sub>                      | 300.00      |
| KNO <sub>3</sub>                                     | 1000.00     |
| MgSO <sub>4</sub>                                    | 17.09       |
| NH <sub>4</sub> NO <sub>3</sub>                      | 1000.00     |
| <b>Vitamins</b>                                      | <b>mg/l</b> |
| Glycine                                              | 4.00        |
| myo-Inositol                                         | 100.00      |
| Nicotinic acid                                       | 1.00        |
| Pyridoxine HCl                                       | 1.00        |
| Thiamine HCl                                         | 10.00       |

---

**WPM (DUCHEFA, NL)**


---

| <b>Micro Elements</b>                                | <b>mg/l</b> |
|------------------------------------------------------|-------------|
| CuSO <sub>4</sub> .5H <sub>2</sub> O                 | 0.25        |
| FeNaEDTA                                             | 36.70       |
| H <sub>3</sub> BO <sub>3</sub>                       | 6.20        |
| MnSO <sub>4</sub> .H <sub>2</sub> O                  | 22.30       |
| Na <sub>2</sub> MoO <sub>4</sub> .2H <sub>2</sub> O  | 0.25        |
| ZnSO <sub>4</sub> .7H <sub>2</sub> O                 | 8.60        |
| <b>Macro Elements</b>                                | <b>mg/l</b> |
| CaCl <sub>2</sub>                                    | 72.50       |
| Ca(NO <sub>3</sub> ) <sub>2</sub> .4H <sub>2</sub> O | 471.26      |
| KH <sub>2</sub> PO <sub>4</sub>                      | 170.00      |
| K <sub>2</sub> SO <sub>4</sub>                       | 990.00      |
| MgSO <sub>4</sub>                                    | 180.54      |
| NH <sub>4</sub> NO <sub>3</sub>                      | 400.00      |
| <b>Vitamins</b>                                      | <b>mg/l</b> |
| Glycine                                              | 2.00        |
| myo-Inositol                                         | 100.00      |

|                |      |
|----------------|------|
| Nicotinic acid | 0.50 |
| Pyridoxine HCl | 0.50 |
| Thiamine HCl   | 1.00 |

---

**MS1B (DUCHEFA, NL)**

---

| <b>Micro Elements</b>                               | <b>mg/l</b> |
|-----------------------------------------------------|-------------|
| CoCl <sub>2</sub> .6H <sub>2</sub> O                | 0.025       |
| CuSO <sub>4</sub> .5H <sub>2</sub> O                | 0.025       |
| FeNaEDTA                                            | 36.70       |
| H <sub>3</sub> BO <sub>3</sub>                      | 6.20        |
| KI                                                  | 0.83        |
| MnSO <sub>4</sub> .H <sub>2</sub> O                 | 16.90       |
| Na <sub>2</sub> MoO <sub>4</sub> .2H <sub>2</sub> O | 0.25        |
| ZnSO <sub>4</sub> .7H <sub>2</sub> O                | 8.60        |
| <b>Macro Elements</b>                               | <b>mg/l</b> |
| CaCl <sub>2</sub>                                   | 166.00      |
| KH <sub>2</sub> PO <sub>4</sub>                     | 85.00       |
| KNO <sub>3</sub>                                    | 950.00      |
| MgSO <sub>4</sub>                                   | 87.86       |
| NH <sub>4</sub> NO <sub>3</sub>                     | 825         |
| <b>Vitamins</b>                                     | <b>mg/l</b> |
| Glycine                                             | 2.00        |
| myo-Inositol                                        | 100.00      |
| Nicotinic acid                                      | 0.50        |
| Pyridoxine HCl                                      | 0.50        |
| Thiamine HCl                                        | 0.10        |

---

**Establishment (pH 5.6)**

| <b>DKW MEDIUM</b>                                                                                                                                   | <b>MS3B MEDIUM</b>                                                                                                    | <b>GD MEDIUM</b>                                                                                                    |
|-----------------------------------------------------------------------------------------------------------------------------------------------------|-----------------------------------------------------------------------------------------------------------------------|---------------------------------------------------------------------------------------------------------------------|
| <b>DKW mineral solution</b><br><b>0.5 mg/L BAP</b><br><b>100 mg/L AA</b><br><b>30g/L sucrose</b><br><b>0.1g sequestrene 138</b><br><b>8g/L Agar</b> | <b>MS3B mineral solution</b><br><b>0.5 mg/L BAP</b><br><b>100 mg/L AA</b><br><b>30g/L sucrose</b><br><b>8g/L Agar</b> | <b>GD mineral solution</b><br><b>0.5 mg/L BAP</b><br><b>100 mg/L AA</b><br><b>30g/L sucrose</b><br><b>8g/L Agar</b> |

**Multiplication (pH 5.6)**

| <b>DKW MEDIUM</b>                                                                                | <b>MS3B MEDIUM</b>                                                                                | <b>GD MEDIUM</b>                                                                                |
|--------------------------------------------------------------------------------------------------|---------------------------------------------------------------------------------------------------|-------------------------------------------------------------------------------------------------|
| <b>DKW mineral solution</b><br><b>0.1 mg/L BAP</b><br><b>0.05 mg/L IBA</b><br><b>100 mg/L AA</b> | <b>MS3B mineral solution</b><br><b>0.1 mg/L BAP</b><br><b>0.05 mg/L IBA</b><br><b>100 mg/L AA</b> | <b>GD mineral solution</b><br><b>0.1 mg/L BAP</b><br><b>0.05 mg/L IBA</b><br><b>100 mg/L AA</b> |

|                                                    |                            |                            |
|----------------------------------------------------|----------------------------|----------------------------|
| 30g/L sucrose<br>0.1g sequestrene 138<br>8g/L Agar | 30g/L sucrose<br>8g/L Agar | 30g/L sucrose<br>8g/L Agar |
|----------------------------------------------------|----------------------------|----------------------------|

### Elongation (pH 5.6)

#### WPM MEDIUM

|                                                                                      |
|--------------------------------------------------------------------------------------|
| WPM mineral solution<br>0.1 mg/L ZEATIN<br>100 mg/L AA<br>30g/L sucrose<br>8g/L Agar |
|--------------------------------------------------------------------------------------|

### Rooting (pH 5.6)

#### INDUCTION ROOTING MEDIUM 1

#### INDUCTION ROOTING MEDIUM 2

|                                      |                                     |
|--------------------------------------|-------------------------------------|
| MS1B<br>25 mg/L IBA<br>30g/L sucrose | MS1B<br>3 mg/L IBA<br>30g/L sucrose |
|--------------------------------------|-------------------------------------|

#### ROOTING EXPRESSION MEDIUM

|                                               |
|-----------------------------------------------|
| MS1B<br>30g/L sucrose<br>0.5g AC<br>8g/L Agar |
|-----------------------------------------------|
